# Supplementary material for: Heavy metal ion discrimination based on distinct interaction between single-stranded DNA and methylene blue
Source: Royal Society of Chemistry journal article supplement (doi:10.1039/c8ay02123f), 2018-11-06
Supplement: c8ay02123f1.pdf [file c8ay02123f1.pdf]

## **Supporting information**

### **Heavy metal ion discrimination based on distinct interaction between single-stranded DNA and methylene blue**

Li Li,<sup>a</sup> Bing Liu,<sup>a</sup> and Zhengbo Chen<sup>\*b</sup>

<sup>a</sup> College of Chemistry and Chemical Engineering, Xinxiang University, Xinxiang 453003, China

<sup>b</sup> Department of Chemistry, Capital Normal University, Beijing, 100048, China

E-mail: [czb979216@sina.com](mailto:czb979216@sina.com)

| 24A | 24C | 24T | Correct % |
|-----|-----|-----|-----------|
|     |     |     | 88.6      |
|     |     |     | 97.1      |
|     |     |     | 68.6      |
|     |     |     | 97.5      |
|     |     |     | 97.1      |
|     |     |     | 97.1      |
|     |     |     | 100       |

**Fig. S1** Jackknifed classification matrix obtained using LDA based on 24A-MB, 24C-MB, and 24T-MB for the 9 metal ion discrimination.

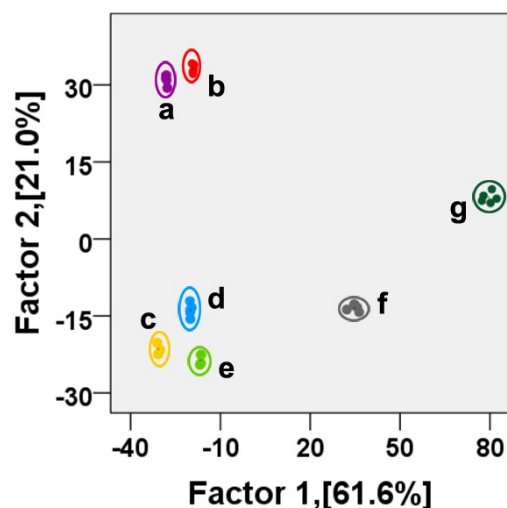

**Fig. S2** Canonical score plot for discrimination mixtures of the 9 metal ions at different molar ratios (total metal ion concentration: 30 nM). a:  $\text{Fe}^{3+}$ :  $\text{Cd}^{2+}$ :  $\text{Pb}^{2+}$ :  $\text{Hg}^{2+}$ :  $\text{Ag}^+$ :  $\text{Sn}^{4+}$ :  $\text{Ni}^{2+}$ :  $\text{Mn}^{2+}$ :  $\text{Cu}^{2+}=2:1:1:1:1:1:1:1$ ; b:  $\text{Fe}^{3+}$ :  $\text{Cd}^{2+}$ :  $\text{Pb}^{2+}$ :  $\text{Hg}^{2+}$ :  $\text{Ag}^+$ :  $\text{Sn}^{4+}$ :  $\text{Ni}^{2+}$ :  $\text{Mn}^{2+}$ :  $\text{Cu}^{2+}=1:2:1:1:1:1:1:1$ ; c:  $\text{Fe}^{3+}$ :  $\text{Cd}^{2+}$ :  $\text{Pb}^{2+}$ :  $\text{Hg}^{2+}$ :  $\text{Ag}^+$ :  $\text{Sn}^{4+}$ :  $\text{Ni}^{2+}$ :  $\text{Mn}^{2+}$ :  $\text{Cu}^{2+}=1:1:1:1:1:2:1:1$ ; d:  $\text{Fe}^{3+}$ :  $\text{Cd}^{2+}$ :  $\text{Pb}^{2+}$ :  $\text{Hg}^{2+}$ :  $\text{Ag}^+$ :  $\text{Sn}^{4+}$ :  $\text{Ni}^{2+}$ :  $\text{Mn}^{2+}$ :  $\text{Cu}^{2+}=1:1:1:1:2:1:1:1$ ; e:  $\text{Fe}^{3+}$ :  $\text{Cd}^{2+}$ :  $\text{Pb}^{2+}$ :  $\text{Hg}^{2+}$ :  $\text{Ag}^+$ :  $\text{Sn}^{4+}$ :  $\text{Ni}^{2+}$ :  $\text{Mn}^{2+}$ :  $\text{Cu}^{2+}=1:1:1:1:1:1:1:2$ ; f:  $\text{Fe}^{3+}$ :  $\text{Cd}^{2+}$ :  $\text{Pb}^{2+}$ :  $\text{Hg}^{2+}$ :  $\text{Ag}^+$ :  $\text{Sn}^{4+}$ :  $\text{Ni}^{2+}$ :  $\text{Mn}^{2+}$ :  $\text{Cu}^{2+}=1:1:2:1:1:1:1:1$ ; and g:  $\text{Fe}^{3+}$ :  $\text{Cd}^{2+}$ :  $\text{Pb}^{2+}$ :  $\text{Hg}^{2+}$ :  $\text{Ag}^+$ :  $\text{Sn}^{4+}$ :  $\text{Ni}^{2+}$ :  $\text{Mn}^{2+}$ :  $\text{Cu}^{2+}=1:1:1:2:1:1:1:1$ .

**Table S1.** The training matrix of the colorimetric response patterns against 9 metal ions using this sensor assay. The concentrations of 24A, 24C, and 24T are all 4.16  $\mu\text{M}$ . MB, 41.67  $\mu\text{M}$ ; TE (10 mM Tris, 1 mM EDTA, pH=8.0), metal ions: 30 nM. Each value is the average of 5 experimental values. The solutions containing the same metal ions were regarded as 5 samples.

| Metal ions       | OD <sub>660 nm</sub> /OD <sub>538 nm</sub> -<br>24A | OD <sub>660 nm</sub> /OD <sub>538 nm</sub> -<br>24C | OD <sub>660 nm</sub> /OD <sub>538 nm</sub> -<br>UV-24T |
|------------------|-----------------------------------------------------|-----------------------------------------------------|--------------------------------------------------------|
| Cd <sup>2+</sup> | 6.89989                                             | 0.436959                                            | 2.24039                                                |
| Cd <sup>2+</sup> | 6.795175                                            | 0.44035                                             | 2.143229                                               |
| Cd <sup>2+</sup> | 6.736045                                            | 0.42281                                             | 2.215474                                               |
| Cd <sup>2+</sup> | 7.058236                                            | 0.429389                                            | 2.185682                                               |
| Cd <sup>2+</sup> | 6.683715                                            | 0.44669                                             | 2.194076                                               |
| Hg <sup>2+</sup> | 0.180407                                            | 0.574044                                            | 2.099671                                               |
| Hg <sup>2+</sup> | 0.181651                                            | 0.578362                                            | 2.185484                                               |
| Hg <sup>2+</sup> | 0.17958                                             | 0.536162                                            | 2.246259                                               |
| Hg <sup>2+</sup> | 0.177995                                            | 0.558569                                            | 2.071244                                               |
| Hg <sup>2+</sup> | 0.184869                                            | 0.573948                                            | 2.049621                                               |
| Pb <sup>2+</sup> | 5.078908                                            | 0.424927                                            | 4.662048                                               |
| Pb <sup>2+</sup> | 4.905491                                            | 0.437931                                            | 4.349206                                               |
| Pb <sup>2+</sup> | 5.234437                                            | 0.403813                                            | 4.092794                                               |
| Pb <sup>2+</sup> | 4.676821                                            | 0.411648                                            | 4.251412                                               |
| Pb <sup>2+</sup> | 5.312602                                            | 0.43041                                             | 4.330655                                               |
| Ag <sup>+</sup>  | 3.734088                                            | 0.651296                                            | 8.879277                                               |
| Ag <sup>+</sup>  | 3.529801                                            | 0.660766                                            | 7.787879                                               |
| Ag <sup>+</sup>  | 4.317881                                            | 0.633585                                            | 8.915176                                               |
| Ag <sup>+</sup>  | 3.419925                                            | 0.631506                                            | 8.027735                                               |
| Ag <sup>+</sup>  | 3.579051                                            | 0.642841                                            | 8.049715                                               |
| Cu <sup>2+</sup> | 1.312931                                            | 1.495085                                            | 6.817053                                               |
| Cu <sup>2+</sup> | 1.288999                                            | 1.477026                                            | 5.313725                                               |
| Cu <sup>2+</sup> | 1.342985                                            | 1.422968                                            | 6.781707                                               |
| Cu <sup>2+</sup> | 1.360172                                            | 1.43167                                             | 6.857888                                               |
| Cu <sup>2+</sup> | 1.303951                                            | 1.493555                                            | 5.974246                                               |
| Sn <sup>4+</sup> | 3.847242                                            | 0.784198                                            | 2.808635                                               |
| Sn <sup>4+</sup> | 3.666115                                            | 0.783562                                            | 3.261111                                               |
| Sn <sup>4+</sup> | 4.1243                                              | 0.740629                                            | 2.830918                                               |
| Sn <sup>4+</sup> | 3.796173                                            | 0.759578                                            | 3.06725                                                |
| Sn <sup>4+</sup> | 3.636661                                            | 0.763427                                            | 2.766368                                               |
| Ni <sup>2+</sup> | 3.749175                                            | 1.617463                                            | 3.942068                                               |
| Ni <sup>2+</sup> | 3.938742                                            | 1.575541                                            | 4.65                                                   |
| Ni <sup>2+</sup> | 3.934658                                            | 1.631325                                            | 3.893531                                               |
| Ni <sup>2+</sup> | 3.920466                                            | 1.575773                                            | 4.201977                                               |
| Ni <sup>2+</sup> | 4.20505                                             | 1.647533                                            | 4.267319                                               |
| Fe <sup>3+</sup> | 10.51881                                            | 0.509785                                            | 3.964694                                               |
| Fe <sup>3+</sup> | 10.46026                                            | 0.507589                                            | 4.083333                                               |

|                  |          |          |          |
|------------------|----------|----------|----------|
| Fe <sup>3+</sup> | 10.17219 | 0.507402 | 4.68742  |
| Fe <sup>3+</sup> | 10.32529 | 0.4923   | 4.043584 |
| Fe <sup>3+</sup> | 10.51391 | 0.50657  | 3.861747 |
| Mn <sup>2+</sup> | 2.951537 | 1.567911 | 6.244578 |
| Mn <sup>2+</sup> | 2.700646 | 1.530575 | 7.055556 |
| Mn <sup>2+</sup> | 2.94458  | 1.532628 | 6.461163 |
| Mn <sup>2+</sup> | 2.625397 | 1.512149 | 5.969868 |
| Mn <sup>2+</sup> | 2.780332 | 1.534678 | 6.139714 |

**Table S2.** Training matrix of the response patterns against Ag<sup>+</sup> and Sn<sup>4+</sup> at different concentrations, respectively, as well as the mixtures of these two metal ions with various molar ratios (total concentration 30 nM) using this sensor array. Each value is the average of 5 experimental values.

| Metal ions                                | OD <sub>660 nm</sub> /OD <sub>538 nm</sub><br>-24A | OD <sub>660 nm</sub> /OD <sub>538 nm</sub><br>-24C | OD <sub>660 nm</sub> /OD <sub>538 nm</sub><br>-24T |
|-------------------------------------------|----------------------------------------------------|----------------------------------------------------|----------------------------------------------------|
| 100% Sn <sup>4+</sup>                     | 0.680964                                           | 1.66815                                            | 1.040487                                           |
| 100% Sn <sup>4+</sup>                     | 0.704868                                           | 1.689187                                           | 1.02582                                            |
| 100% Sn <sup>4+</sup>                     | 0.692976                                           | 1.676293                                           | 1.035266                                           |
| 100% Sn <sup>4+</sup>                     | 0.694128                                           | 1.675224                                           | 1.047384                                           |
| 100% Sn <sup>4+</sup>                     | 0.687949                                           | 1.686882                                           | 1.036907                                           |
| 100% Ag <sup>+</sup>                      | 0.603494                                           | 1.284727                                           | 1.33066                                            |
| 100% Ag <sup>+</sup>                      | 0.626723                                           | 1.298879                                           | 1.316665                                           |
| 100% Ag <sup>+</sup>                      | 0.61992                                            | 1.297277                                           | 1.336706                                           |
| 100% Ag <sup>+</sup>                      | 0.620545                                           | 1.306563                                           | 1.336867                                           |
| 100% Ag <sup>+</sup>                      | 0.605296                                           | 1.28695                                            | 1.320938                                           |
| 10% Ag <sup>+</sup> +90% Sn <sup>4+</sup> | 1.583563                                           | 1.14387                                            | 1.038741                                           |
| 10% Ag <sup>+</sup> +90% Sn <sup>4+</sup> | 1.656984                                           | 1.161285                                           | 1.0274                                             |
| 10% Ag <sup>+</sup> +90% Sn <sup>4+</sup> | 1.631939                                           | 1.150428                                           | 1.033728                                           |
| 10% Ag <sup>+</sup> +90% Sn <sup>4+</sup> | 1.620457                                           | 1.149502                                           | 1.055509                                           |
| 10% Ag <sup>+</sup> +90% Sn <sup>4+</sup> | 1.58164                                            | 1.152318                                           | 1.049264                                           |
| 30% Ag <sup>+</sup> +70% Sn <sup>4+</sup> | 0.766362                                           | 1.636497                                           | 1.013374                                           |
| 30% Ag <sup>+</sup> +70% Sn <sup>4+</sup> | 0.79568                                            | 1.653561                                           | 1.013114                                           |
| 30% Ag <sup>+</sup> +70% Sn <sup>4+</sup> | 0.779808                                           | 1.652771                                           | 1.016968                                           |
| 30% Ag <sup>+</sup> +70% Sn <sup>4+</sup> | 0.790272                                           | 1.666748                                           | 1.029518                                           |
| 30% Ag <sup>+</sup> +70% Sn <sup>4+</sup> | 0.775627                                           | 1.655255                                           | 1.026291                                           |
| 50% Ag <sup>+</sup> +50% Sn <sup>4+</sup> | 0.716699                                           | 1.845555                                           | 0.953408                                           |
| 50% Ag <sup>+</sup> +50% Sn <sup>4+</sup> | 0.724888                                           | 1.883157                                           | 0.945227                                           |
| 50% Ag <sup>+</sup> +50% Sn <sup>4+</sup> | 0.707496                                           | 1.862498                                           | 0.962179                                           |
| 50% Ag <sup>+</sup> +50% Sn <sup>4+</sup> | 0.731265                                           | 1.872278                                           | 0.967871                                           |
| 50% Ag <sup>+</sup> +50% Sn <sup>4+</sup> | 0.716505                                           | 1.867421                                           | 0.951605                                           |
| 70% Ag <sup>+</sup> +30% Sn <sup>4+</sup> | 0.694374                                           | 1.592701                                           | 1.020982                                           |
| 70% Ag <sup>+</sup> +30% Sn <sup>4+</sup> | 0.719685                                           | 1.613048                                           | 1.018047                                           |
| 70% Ag <sup>+</sup> +30% Sn <sup>4+</sup> | 0.705364                                           | 1.618918                                           | 1.033196                                           |
| 70% Ag <sup>+</sup> +30% Sn <sup>4+</sup> | 0.71219                                            | 1.617401                                           | 1.045859                                           |
| 70% Ag <sup>+</sup> +30% Sn <sup>4+</sup> | 0.707113                                           | 1.62479                                            | 1.03328                                            |
| 90% Ag <sup>+</sup> +10% Sn <sup>4+</sup> | 0.642375                                           | 1.494504                                           | 1.091238                                           |
| 90% Ag <sup>+</sup> +10% Sn <sup>4+</sup> | 0.667916                                           | 1.516516                                           | 1.079115                                           |
| 90% Ag <sup>+</sup> +10% Sn <sup>4+</sup> | 0.641187                                           | 1.48306                                            | 1.090098                                           |
| 90% Ag <sup>+</sup> +10% Sn <sup>4+</sup> | 0.64956                                            | 1.492642                                           | 1.109763                                           |
| 90% Ag <sup>+</sup> +10% Sn <sup>4+</sup> | 0.634445                                           | 1.501629                                           | 1.091686                                           |

**Table S3.** The training matrix of the colorimetric response patterns against Cd<sup>2+</sup> with different concentrations (30-200 nM) using this sensor assay. Each value is the average of 5 experimental values.

| Metal ions | OD <sub>660 nm</sub> /OD <sub>538 nm</sub><br>-24A | OD <sub>660 nm</sub> /OD <sub>538 nm</sub><br>-24C | OD <sub>660 nm</sub> /OD <sub>538 nm</sub><br>-24T |
|------------|----------------------------------------------------|----------------------------------------------------|----------------------------------------------------|
| 30 nM      | 6.630085                                           | 0.428108                                           | 0.313651                                           |
| 30 nM      | 6.765218                                           | 0.431262                                           | 0.317853                                           |
| 30 nM      | 6.521465                                           | 0.412386                                           | 0.321482                                           |
| 30 nM      | 6.715621                                           | 0.424448                                           | 0.309565                                           |
| 30 nM      | 6.413628                                           | 0.419562                                           | 0.320548                                           |
| 60 nM      | 5.037929                                           | 0.470758                                           | 0.225586                                           |
| 60 nM      | 5.142335                                           | 0.486623                                           | 0.237158                                           |
| 60 nM      | 5.215352                                           | 0.474017                                           | 0.214656                                           |
| 60 nM      | 5.065123                                           | 0.469598                                           | 0.221487                                           |
| 60 nM      | 4.986482                                           | 0.491232                                           | 0.232112                                           |
| 90 nM      | 3.516556                                           | 0.51655                                            | 0.141613                                           |
| 90 nM      | 3.475831                                           | 0.504568                                           | 0.161231                                           |
| 90 nM      | 3.611231                                           | 0.523235                                           | 0.156735                                           |
| 90 nM      | 3.395122                                           | 0.524118                                           | 0.149513                                           |
| 90 nM      | 3.595131                                           | 0.519776                                           | 0.144528                                           |
| 120 nM     | 2.829139                                           | 0.556606                                           | 0.06592                                            |
| 120 nM     | 2.796323                                           | 0.561952                                           | 0.064985                                           |
| 120 nM     | 2.712335                                           | 0.568623                                           | 0.063875                                           |
| 120 nM     | 2.864988                                           | 0.581265                                           | 0.065212                                           |
| 120 nM     | 2.672321                                           | 0.546952                                           | 0.065653                                           |
| 200 nM     | 1.207506                                           | 0.673977                                           | 0.025184                                           |
| 200 nM     | 1.262335                                           | 0.695301                                           | 0.028323                                           |
| 200 nM     | 1.315321                                           | 0.684532                                           | 0.026245                                           |
| 200 nM     | 1.229883                                           | 0.675632                                           | 0.025436                                           |
| 200 nM     | 1.398876                                           | 0.686941                                           | 0.024821                                           |

**Table S4.** Identification of unknown metal ion samples at 30 nM using 24T. The metal ions in red font indicate that these metal ions were not correctly identified.

| Samples | OD <sub>660nm</sub> /OD <sub>538nm</sub><br>-24T | Identification   | Verification           |
|---------|--------------------------------------------------|------------------|------------------------|
| 1       | 2.24039                                          | Cd <sup>2+</sup> | Cd <sup>2+</sup>       |
| 2       | 2.143229                                         | Cd <sup>2+</sup> | <b>Hg<sup>2+</sup></b> |
| 3       | 2.215474                                         | Cd <sup>2+</sup> | Cd <sup>2+</sup>       |
| 4       | 2.185682                                         | Cd <sup>2+</sup> | Cd <sup>2+</sup>       |
| 5       | 2.194076                                         | Cd <sup>2+</sup> | Cd <sup>2+</sup>       |
| 6       | 2.099671                                         | Hg <sup>2+</sup> | Hg <sup>2+</sup>       |
| 7       | 2.185484                                         | Hg <sup>2+</sup> | <b>Cd<sup>2+</sup></b> |
| 8       | 2.246259                                         | Hg <sup>2+</sup> | <b>Cd<sup>2+</sup></b> |
| 9       | 2.071244                                         | Hg <sup>2+</sup> | Hg <sup>2+</sup>       |
| 10      | 2.049621                                         | Hg <sup>2+</sup> | Hg <sup>2+</sup>       |
| 11      | 4.662048                                         | Pb <sup>2+</sup> | Pb <sup>2+</sup>       |
| 12      | 4.349206                                         | Pb <sup>2+</sup> | Pb <sup>2+</sup>       |
| 13      | 4.092794                                         | Pb <sup>2+</sup> | <b>Fe<sup>3+</sup></b> |
| 14      | 4.251412                                         | Pb <sup>2+</sup> | <b>Ni<sup>2+</sup></b> |
| 15      | 4.330655                                         | Pb <sup>2+</sup> | Pb <sup>2+</sup>       |
| 16      | 8.879277                                         | Ag <sup>+</sup>  | Ag <sup>+</sup>        |
| 17      | 7.787879                                         | Ag <sup>+</sup>  | Ag <sup>+</sup>        |
| 18      | 8.915176                                         | Ag <sup>+</sup>  | Ag <sup>+</sup>        |
| 19      | 8.027735                                         | Ag <sup>+</sup>  | Ag <sup>+</sup>        |
| 20      | 8.049715                                         | Ag <sup>+</sup>  | Ag <sup>+</sup>        |
| 21      | 6.817053                                         | Cu <sup>2+</sup> | <b>Mn<sup>2+</sup></b> |
| 22      | 5.313725                                         | Cu <sup>2+</sup> | <b>Pb<sup>2+</sup></b> |
| 23      | 6.781707                                         | Cu <sup>2+</sup> | <b>Mn<sup>2+</sup></b> |
| 24      | 6.857888                                         | Cu <sup>2+</sup> | <b>Mn<sup>2+</sup></b> |
| 25      | 5.974246                                         | Cu <sup>2+</sup> | Cu <sup>2+</sup>       |
| 26      | 2.808635                                         | Sn <sup>4+</sup> | Sn <sup>4+</sup>       |
| 27      | 3.261111                                         | Sn <sup>4+</sup> | Sn <sup>4+</sup>       |
| 28      | 2.830918                                         | Sn <sup>4+</sup> | Sn <sup>4+</sup>       |
| 29      | 3.06725                                          | Sn <sup>4+</sup> | Sn <sup>4+</sup>       |
| 30      | 2.766368                                         | Sn <sup>4+</sup> | Sn <sup>4+</sup>       |
| 31      | 3.942068                                         | Ni <sup>2+</sup> | <b>Fe<sup>3+</sup></b> |
| 32      | 4.65                                             | Ni <sup>2+</sup> | <b>Pb<sup>2+</sup></b> |
| 33      | 3.893531                                         | Ni <sup>2+</sup> | <b>Fe<sup>3+</sup></b> |
| 34      | 4.201977                                         | Ni <sup>2+</sup> | Ni <sup>2+</sup>       |
| 35      | 4.267319                                         | Ni <sup>2+</sup> | <b>Pb<sup>2+</sup></b> |
| 36      | 3.964694                                         | Fe <sup>3+</sup> | Fe <sup>3+</sup>       |
| 37      | 4.083333                                         | Fe <sup>3+</sup> | Fe <sup>3+</sup>       |
| 38      | 4.68742                                          | Fe <sup>3+</sup> | <b>Pb<sup>2+</sup></b> |
| 39      | 4.043584                                         | Fe <sup>3+</sup> | Fe <sup>3+</sup>       |



|    |          |                  |                        |
|----|----------|------------------|------------------------|
| 40 | 3.861747 | Fe <sup>3+</sup> | Fe <sup>3+</sup>       |
| 41 | 6.244578 | Mn <sup>2+</sup> | <b>Cu<sup>2+</sup></b> |
| 42 | 7.055556 | Mn <sup>2+</sup> | Mn <sup>2+</sup>       |
| 43 | 6.461163 | Mn <sup>2+</sup> | Mn <sup>2+</sup>       |
| 44 | 5.969868 | Mn <sup>2+</sup> | <b>Cu<sup>2+</sup></b> |
| 45 | 6.139714 | Mn <sup>2+</sup> | <b>Cu<sup>2+</sup></b> |

**Table S5.** Identification of unknown metal ion samples at 30 nM using 24C+ 24T.

| Samples | OD <sub>660nm</sub> /OD <sub>538nm</sub><br>-24C | OD <sub>660nm</sub> /OD <sub>538nm</sub><br>-24T | Identification   | Verification           |
|---------|--------------------------------------------------|--------------------------------------------------|------------------|------------------------|
| 1       | 0.436959                                         | 2.24039                                          | Cd <sup>2+</sup> | Cd <sup>2+</sup>       |
| 2       | 0.44035                                          | 2.143229                                         | Cd <sup>2+</sup> | Cd <sup>2+</sup>       |
| 3       | 0.42281                                          | 2.215474                                         | Cd <sup>2+</sup> | Cd <sup>2+</sup>       |
| 4       | 0.429389                                         | 2.185682                                         | Cd <sup>2+</sup> | Cd <sup>2+</sup>       |
| 5       | 0.44669                                          | 2.194076                                         | Cd <sup>2+</sup> | Cd <sup>2+</sup>       |
| 6       | 0.574044                                         | 2.099671                                         | Hg <sup>2+</sup> | Hg <sup>2+</sup>       |
| 7       | 0.578362                                         | 2.185484                                         | Hg <sup>2+</sup> | Hg <sup>2+</sup>       |
| 8       | 0.536162                                         | 2.246259                                         | Hg <sup>2+</sup> | Hg <sup>2+</sup>       |
| 9       | 0.558569                                         | 2.071244                                         | Hg <sup>2+</sup> | Hg <sup>2+</sup>       |
| 10      | 0.573948                                         | 2.049621                                         | Hg <sup>2+</sup> | Hg <sup>2+</sup>       |
| 11      | 0.424927                                         | 4.662048                                         | Pb <sup>2+</sup> | Pb <sup>2+</sup>       |
| 12      | 0.437931                                         | 4.349206                                         | Pb <sup>2+</sup> | Pb <sup>2+</sup>       |
| 13      | 0.403813                                         | 4.092794                                         | Pb <sup>2+</sup> | Pb <sup>2+</sup>       |
| 14      | 0.411648                                         | 4.251412                                         | Pb <sup>2+</sup> | Pb <sup>2+</sup>       |
| 15      | 0.43041                                          | 4.330655                                         | Pb <sup>2+</sup> | Pb <sup>2+</sup>       |
| 16      | 0.651296                                         | 8.879277                                         | Ag <sup>+</sup>  | Ag <sup>+</sup>        |
| 17      | 0.660766                                         | 7.787879                                         | Ag <sup>+</sup>  | Ag <sup>+</sup>        |
| 18      | 0.633585                                         | 8.915176                                         | Ag <sup>+</sup>  | Ag <sup>+</sup>        |
| 19      | 0.631506                                         | 8.027735                                         | Ag <sup>+</sup>  | Ag <sup>+</sup>        |
| 20      | 0.642841                                         | 8.049715                                         | Ag <sup>+</sup>  | Ag <sup>+</sup>        |
| 21      | 1.495085                                         | 6.817053                                         | Cu <sup>2+</sup> | <b>Mn<sup>2+</sup></b> |
| 22      | 1.477026                                         | 5.313725                                         | Cu <sup>2+</sup> | Cu <sup>2+</sup>       |
| 23      | 1.422968                                         | 6.781707                                         | Cu <sup>2+</sup> | Cu <sup>2+</sup>       |
| 24      | 1.43167                                          | 6.857888                                         | Cu <sup>2+</sup> | Cu <sup>2+</sup>       |
| 25      | 1.493555                                         | 5.974246                                         | Cu <sup>2+</sup> | Cu <sup>2+</sup>       |
| 26      | 0.784198                                         | 2.808635                                         | Sn <sup>4+</sup> | Sn <sup>4+</sup>       |
| 27      | 0.783562                                         | 3.261111                                         | Sn <sup>4+</sup> | Sn <sup>4+</sup>       |
| 28      | 0.740629                                         | 2.830918                                         | Sn <sup>4+</sup> | Sn <sup>4+</sup>       |
| 29      | 0.759578                                         | 3.06725                                          | Sn <sup>4+</sup> | Sn <sup>4+</sup>       |
| 30      | 0.763427                                         | 2.766368                                         | Sn <sup>4+</sup> | Sn <sup>4+</sup>       |
| 31      | 1.617463                                         | 3.942068                                         | Ni <sup>2+</sup> | Ni <sup>2+</sup>       |
| 32      | 1.575541                                         | 4.65                                             | Ni <sup>2+</sup> | Ni <sup>2+</sup>       |
| 33      | 1.631325                                         | 3.893531                                         | Ni <sup>2+</sup> | Ni <sup>2+</sup>       |
| 34      | 1.575773                                         | 4.201977                                         | Ni <sup>2+</sup> | Ni <sup>2+</sup>       |
| 35      | 1.647533                                         | 4.267319                                         | Ni <sup>2+</sup> | Ni <sup>2+</sup>       |
| 36      | 0.509785                                         | 3.964694                                         | Fe <sup>3+</sup> | Fe <sup>3+</sup>       |
| 37      | 0.507589                                         | 4.083333                                         | Fe <sup>3+</sup> | Fe <sup>3+</sup>       |
| 38      | 0.507402                                         | 4.68742                                          | Fe <sup>3+</sup> | Fe <sup>3+</sup>       |
| 39      | 0.4923                                           | 4.043584                                         | Fe <sup>3+</sup> | Fe <sup>3+</sup>       |
| 40      | 0.50657                                          | 3.861747                                         | Fe <sup>3+</sup> | Fe <sup>3+</sup>       |

|    |          |          |                  |                  |
|----|----------|----------|------------------|------------------|
| 41 | 1.567911 | 6.244578 | Mn <sup>2+</sup> | Mn <sup>2+</sup> |
| 42 | 1.530575 | 7.055556 | Mn <sup>2+</sup> | Mn <sup>2+</sup> |
| 43 | 1.532628 | 6.461163 | Mn <sup>2+</sup> | Mn <sup>2+</sup> |
| 44 | 1.512149 | 5.969868 | Mn <sup>2+</sup> | Mn <sup>2+</sup> |
| 45 | 1.534678 | 6.139714 | Mn <sup>2+</sup> | Mn <sup>2+</sup> |

**Table S6.** Identification of unknown metal ion samples at 30 nM using 24A + 24C + 24T.

| Samples | OD <sub>660nm</sub> /OD <sub>538nm</sub><br>-24A | OD <sub>660nm</sub> /OD <sub>538nm</sub><br>-24C | OD <sub>660nm</sub> /OD <sub>538nm</sub><br>-24T | Identification   | Verificatio<br>n |
|---------|--------------------------------------------------|--------------------------------------------------|--------------------------------------------------|------------------|------------------|
| 1       | 6.89989                                          | 0.436959                                         | 2.24039                                          | Cd <sup>2+</sup> | Cd <sup>2+</sup> |
| 2       | 6.795175                                         | 0.44035                                          | 2.143229                                         | Cd <sup>2+</sup> | Cd <sup>2+</sup> |
| 3       | 6.736045                                         | 0.42281                                          | 2.215474                                         | Cd <sup>2+</sup> | Cd <sup>2+</sup> |
| 4       | 7.058236                                         | 0.429389                                         | 2.185682                                         | Cd <sup>2+</sup> | Cd <sup>2+</sup> |
| 5       | 6.683715                                         | 0.44669                                          | 2.194076                                         | Cd <sup>2+</sup> | Cd <sup>2+</sup> |
| 6       | 0.180407                                         | 0.574044                                         | 2.099671                                         | Hg <sup>2+</sup> | Hg <sup>2+</sup> |
| 7       | 0.181651                                         | 0.578362                                         | 2.185484                                         | Hg <sup>2+</sup> | Hg <sup>2+</sup> |
| 8       | 0.17958                                          | 0.536162                                         | 2.246259                                         | Hg <sup>2+</sup> | Hg <sup>2+</sup> |
| 9       | 0.177995                                         | 0.558569                                         | 2.071244                                         | Hg <sup>2+</sup> | Hg <sup>2+</sup> |
| 10      | 0.184869                                         | 0.573948                                         | 2.049621                                         | Hg <sup>2+</sup> | Hg <sup>2+</sup> |
| 11      | 5.078908                                         | 0.424927                                         | 4.662048                                         | Pb <sup>2+</sup> | Pb <sup>2+</sup> |
| 12      | 4.905491                                         | 0.437931                                         | 4.349206                                         | Pb <sup>2+</sup> | Pb <sup>2+</sup> |
| 13      | 5.234437                                         | 0.403813                                         | 4.092794                                         | Pb <sup>2+</sup> | Pb <sup>2+</sup> |
| 14      | 4.676821                                         | 0.411648                                         | 4.251412                                         | Pb <sup>2+</sup> | Pb <sup>2+</sup> |
| 15      | 5.312602                                         | 0.43041                                          | 4.330655                                         | Pb <sup>2+</sup> | Pb <sup>2+</sup> |
| 16      | 3.734088                                         | 0.651296                                         | 8.879277                                         | Ag <sup>+</sup>  | Ag <sup>+</sup>  |
| 17      | 3.529801                                         | 0.660766                                         | 7.787879                                         | Ag <sup>+</sup>  | Ag <sup>+</sup>  |
| 18      | 4.317881                                         | 0.633585                                         | 8.915176                                         | Ag <sup>+</sup>  | Ag <sup>+</sup>  |
| 19      | 3.419925                                         | 0.631506                                         | 8.027735                                         | Ag <sup>+</sup>  | Ag <sup>+</sup>  |
| 20      | 3.579051                                         | 0.642841                                         | 8.049715                                         | Ag <sup>+</sup>  | Ag <sup>+</sup>  |
| 21      | 1.312931                                         | 1.495085                                         | 6.817053                                         | Cu <sup>2+</sup> | Cu <sup>2+</sup> |
| 22      | 1.288999                                         | 1.477026                                         | 5.313725                                         | Cu <sup>2+</sup> | Cu <sup>2+</sup> |
| 23      | 1.342985                                         | 1.422968                                         | 6.781707                                         | Cu <sup>2+</sup> | Cu <sup>2+</sup> |
| 24      | 1.360172                                         | 1.43167                                          | 6.857888                                         | Cu <sup>2+</sup> | Cu <sup>2+</sup> |
| 25      | 1.303951                                         | 1.493555                                         | 5.974246                                         | Cu <sup>2+</sup> | Cu <sup>2+</sup> |
| 26      | 3.847242                                         | 0.784198                                         | 2.808635                                         | Sn <sup>4+</sup> | Sn <sup>4+</sup> |
| 27      | 3.666115                                         | 0.783562                                         | 3.261111                                         | Sn <sup>4+</sup> | Sn <sup>4+</sup> |
| 28      | 4.1243                                           | 0.740629                                         | 2.830918                                         | Sn <sup>4+</sup> | Sn <sup>4+</sup> |
| 29      | 3.796173                                         | 0.759578                                         | 3.06725                                          | Sn <sup>4+</sup> | Sn <sup>4+</sup> |
| 30      | 3.636661                                         | 0.763427                                         | 2.766368                                         | Sn <sup>4+</sup> | Sn <sup>4+</sup> |
| 31      | 3.749175                                         | 1.617463                                         | 3.942068                                         | Ni <sup>2+</sup> | Ni <sup>2+</sup> |
| 32      | 3.938742                                         | 1.575541                                         | 4.65                                             | Ni <sup>2+</sup> | Ni <sup>2+</sup> |
| 33      | 3.934658                                         | 1.631325                                         | 3.893531                                         | Ni <sup>2+</sup> | Ni <sup>2+</sup> |
| 34      | 3.920466                                         | 1.575773                                         | 4.201977                                         | Ni <sup>2+</sup> | Ni <sup>2+</sup> |
| 35      | 4.20505                                          | 1.647533                                         | 4.267319                                         | Ni <sup>2+</sup> | Ni <sup>2+</sup> |
| 36      | 10.51881                                         | 0.509785                                         | 3.964694                                         | Fe <sup>3+</sup> | Fe <sup>3+</sup> |
| 37      | 10.46026                                         | 0.507589                                         | 4.083333                                         | Fe <sup>3+</sup> | Fe <sup>3+</sup> |
| 38      | 10.17219                                         | 0.507402                                         | 4.68742                                          | Fe <sup>3+</sup> | Fe <sup>3+</sup> |

|    |          |          |          |                  |                  |
|----|----------|----------|----------|------------------|------------------|
| 39 | 10.32529 | 0.4923   | 4.043584 | Fe <sup>3+</sup> | Fe <sup>3+</sup> |
| 40 | 10.51391 | 0.50657  | 3.861747 | Fe <sup>3+</sup> | Fe <sup>3+</sup> |
| 41 | 2.951537 | 1.567911 | 6.244578 | Mn <sup>2+</sup> | Mn <sup>2+</sup> |
| 42 | 2.700646 | 1.530575 | 7.055556 | Mn <sup>2+</sup> | Mn <sup>2+</sup> |
| 43 | 2.94458  | 1.532628 | 6.461163 | Mn <sup>2+</sup> | Mn <sup>2+</sup> |
| 44 | 2.625397 | 1.512149 | 5.969868 | Mn <sup>2+</sup> | Mn <sup>2+</sup> |
| 45 | 2.780332 | 1.534678 | 6.139714 | Mn <sup>2+</sup> | Mn <sup>2+</sup> |

**Table S7.** Training matrix of the response patterns against metal ions (each at 30 nM) in the presence of tap water using the sensor array.

| Metal ions       | OD <sub>660 nm</sub> /OD <sub>538 nm</sub> -<br>24A | OD <sub>660 nm</sub> /OD <sub>538 nm</sub> -<br>24C | OD <sub>660 nm</sub> /OD <sub>538 nm</sub> -<br>24T |
|------------------|-----------------------------------------------------|-----------------------------------------------------|-----------------------------------------------------|
| Cd <sup>2+</sup> | 0.877944                                            | 0.989211                                            | 1.050379                                            |
| Cd <sup>2+</sup> | 0.868676                                            | 0.98256                                             | 1.055599                                            |
| Cd <sup>2+</sup> | 0.883566                                            | 0.972536                                            | 1.044739                                            |
| Cd <sup>2+</sup> | 0.864108                                            | 0.988728                                            | 1.020234                                            |
| Cd <sup>2+</sup> | 0.88769                                             | 0.9536                                              | 1.051525                                            |
| Hg <sup>2+</sup> | 0.054328                                            | 0.992698                                            | 1.015826                                            |
| Hg <sup>2+</sup> | 0.052877                                            | 0.997162                                            | 1.018282                                            |
| Hg <sup>2+</sup> | 0.052577                                            | 0.980823                                            | 1.02578                                             |
| Hg <sup>2+</sup> | 0.050929                                            | 1.00161                                             | 1.010041                                            |
| Hg <sup>2+</sup> | 0.054873                                            | 1.007898                                            | 1.016399                                            |
| Pb <sup>2+</sup> | 0.867933                                            | 1.011022                                            | 0.946451                                            |
| Pb <sup>2+</sup> | 0.85948                                             | 1.024691                                            | 0.958944                                            |
| Pb <sup>2+</sup> | 0.866893                                            | 1.003333                                            | 0.949152                                            |
| Pb <sup>2+</sup> | 0.858671                                            | 1.017214                                            | 0.93572                                             |
| Pb <sup>2+</sup> | 0.858702                                            | 1.06877                                             | 0.940832                                            |
| Ag <sup>+</sup>  | 0.927716                                            | 0.953841                                            | 0.903045                                            |
| Ag <sup>+</sup>  | 0.922127                                            | 0.947523                                            | 0.903108                                            |
| Ag <sup>+</sup>  | 0.933488                                            | 0.940716                                            | 0.912136                                            |
| Ag <sup>+</sup>  | 0.923637                                            | 0.940666                                            | 0.89233                                             |
| Ag <sup>+</sup>  | 0.927611                                            | 0.950475                                            | 0.908052                                            |
| Cu <sup>2+</sup> | 0.804987                                            | 1.01898                                             | 0.845456                                            |
| Cu <sup>2+</sup> | 0.797384                                            | 1.016796                                            | 0.858673                                            |
| Cu <sup>2+</sup> | 0.819785                                            | 0.995483                                            | 0.856765                                            |
| Cu <sup>2+</sup> | 0.80555                                             | 1.00156                                             | 0.846687                                            |
| Cu <sup>2+</sup> | 0.780876                                            | 1.038787                                            | 0.83713                                             |
| Sn <sup>4+</sup> | 0.816606                                            | 1.102324                                            | 1.058435                                            |
| Sn <sup>4+</sup> | 0.806518                                            | 1.126189                                            | 1.087476                                            |
| Sn <sup>4+</sup> | 0.828042                                            | 1.096592                                            | 1.068301                                            |
| Sn <sup>4+</sup> | 0.835208                                            | 1.130435                                            | 1.067163                                            |
| Sn <sup>4+</sup> | 0.817069                                            | 1.134168                                            | 1.080343                                            |
| Ni <sup>2+</sup> | 0.812692                                            | 1.071645                                            | 1.01492                                             |
| Ni <sup>2+</sup> | 0.80978                                             | 1.069325                                            | 1.023218                                            |
| Ni <sup>2+</sup> | 0.830242                                            | 1.056651                                            | 1.026501                                            |
| Ni <sup>2+</sup> | 0.814467                                            | 1.051282                                            | 1.019013                                            |
| Ni <sup>2+</sup> | 0.792839                                            | 1.068982                                            | 1.02774                                             |
| Fe <sup>3+</sup> | 1.781011                                            | 1.009642                                            | 0.911094                                            |
| Fe <sup>3+</sup> | 1.747461                                            | 1.007405                                            | 0.921537                                            |
| Fe <sup>3+</sup> | 1.790204                                            | 0.995651                                            | 0.92579                                             |

|                  |          |          |          |
|------------------|----------|----------|----------|
| Fe <sup>3+</sup> | 1.764451 | 0.99542  | 0.915137 |
| Fe <sup>3+</sup> | 1.785715 | 0.993708 | 0.917807 |
| Mn <sup>2+</sup> | 0.835658 | 0.97557  | 1.046073 |
| Mn <sup>2+</sup> | 0.835171 | 0.977112 | 1.046873 |
| Mn <sup>2+</sup> | 0.841831 | 0.962547 | 1.038991 |
| Mn <sup>2+</sup> | 0.845102 | 0.970588 | 1.034089 |
| Mn <sup>2+</sup> | 0.829499 | 0.972268 | 1.043057 |
| Tap water        | 0.906237 | 1.102263 | 1.015502 |
| Tap water        | 0.893211 | 1.11174  | 1.020253 |
| Tap water        | 0.904705 | 1.110005 | 1.021764 |
| Tap water        | 0.925048 | 1.108025 | 1.015381 |
| Tap water        | 0.897072 | 1.105168 | 1.017921 |
